# Supplementary material for: Single -crystal sodium nickel phosphate nanoparticles as supercapacitor cathodes with ultra-high capacitance and rate-performance
Source: Royal Society of Chemistry journal article supplement (doi:10.1039/d4nr04664a), 2025-01-01
Supplement: d4nr04664a1.pdf [file d4nr04664a1.pdf]

## Supporting Information

### **Single-crystal sodium nickel phosphate nanoparticles as ultra-high capacitance and rate-performance cathode of supercapacitor**

Ning Wang, Zhijie Zhang, Jixian Ma, Jie Sun, Xuexia He, Zhibin Lei, Zong-huai Liu,  
and Qi Li\*

N. Wang, Z. J. Zhang, J. X. Ma, Prof. J. Sun, Prof X. X. He, Prof Z. B. Lei, Prof. Z-h  
Liu, Prof Q. Li.

Key Laboratory of Applied Surface and Colloid Chemistry, Shaanxi Normal  
University, Ministry of Education, Xi'an, 710062, P. R. China.

E-mail: [clliqi@snnu.edu.cn](mailto:clliqi@snnu.edu.cn)

N. Wang, Z. J. Zhang, J. X. Ma, Prof. J. Sun, Prof X. X. He, Prof Z. B. Lei, Prof. Z-h  
Liu, Prof Q. Li.

School of Materials Science and Engineering, Shaanxi Normal University, Xi'an,  
710119, P. R. China.

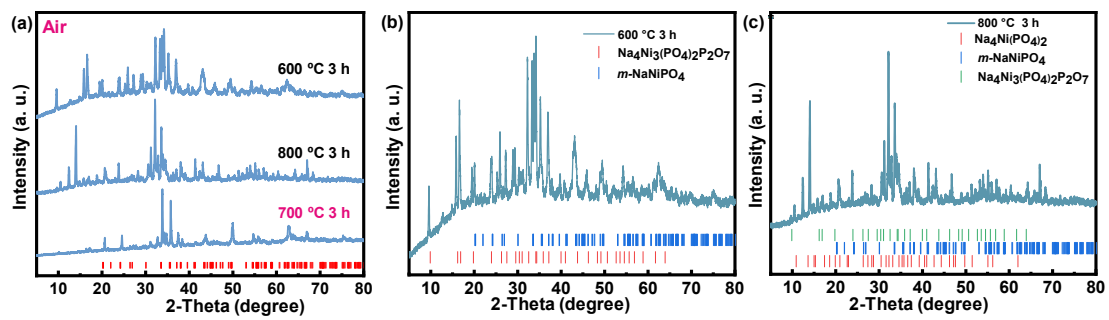

**Figure S1.** XRD patterns of prepared products at different calcination temperatures

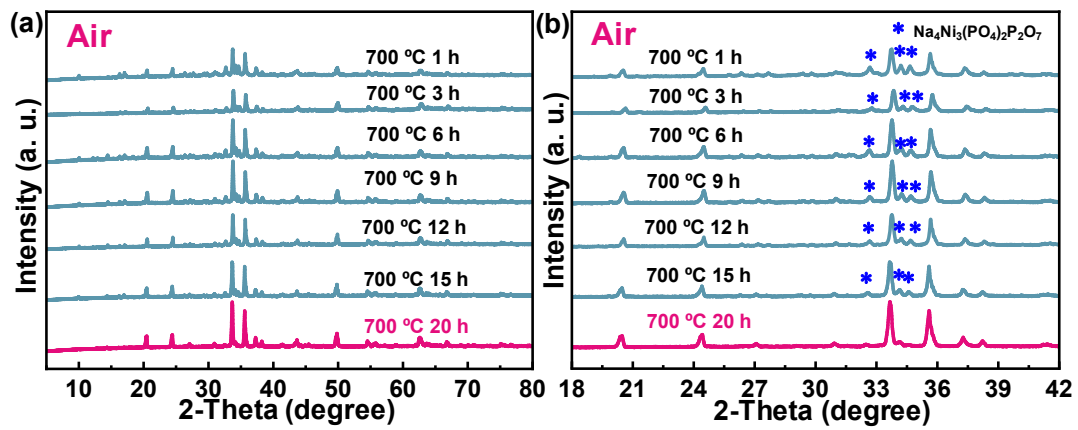

Figure S2. XRD patterns of prepared products at different calcination time

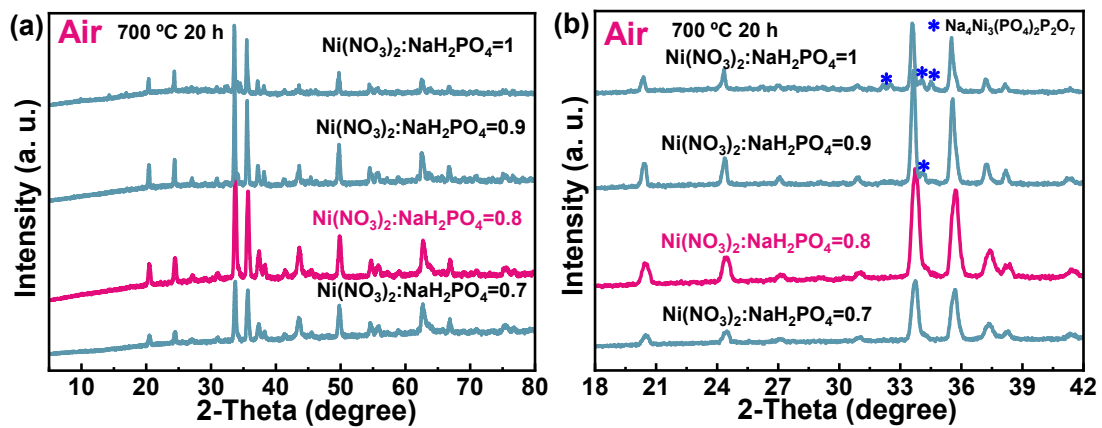

Figure S3. XRD patterns of prepared products with different precursor proportions

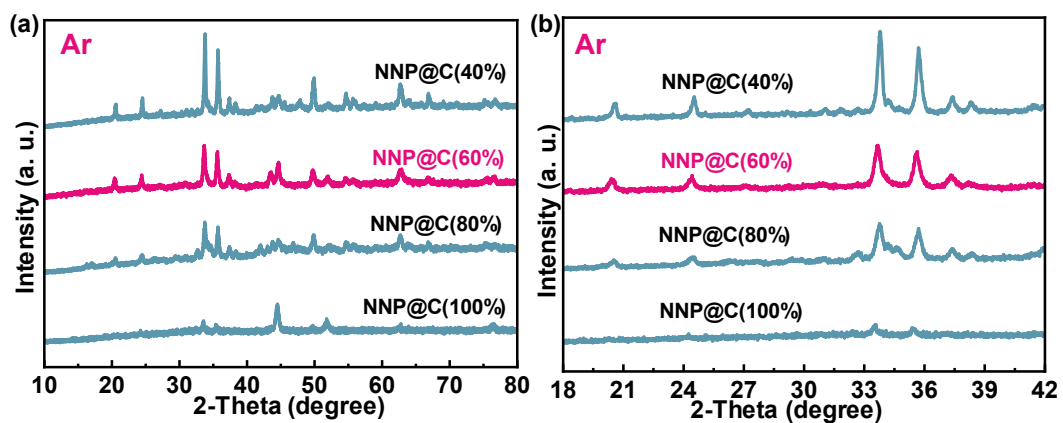

**Figure S4.** XRD patterns of prepared NNP@C composites with different carbon source

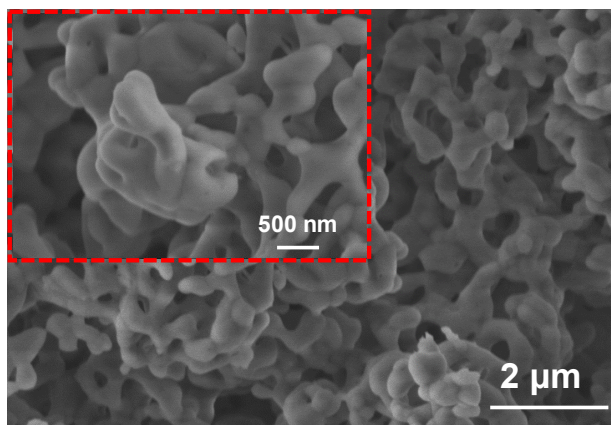

**Figure S5.** SEM images of NNP product pellet after calcination

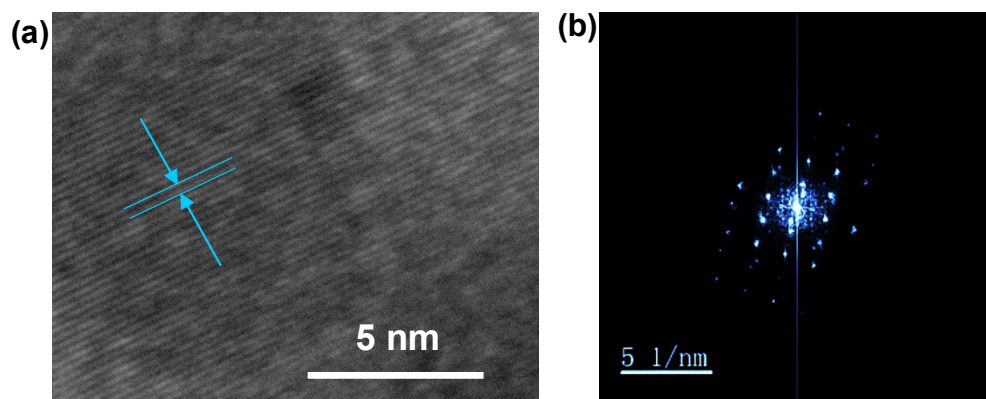

**Figure S6.** (a) High-resolution transmission electron microscopy (HRTEM) images (b) Fast Fourier Transform (FFT) of NNP

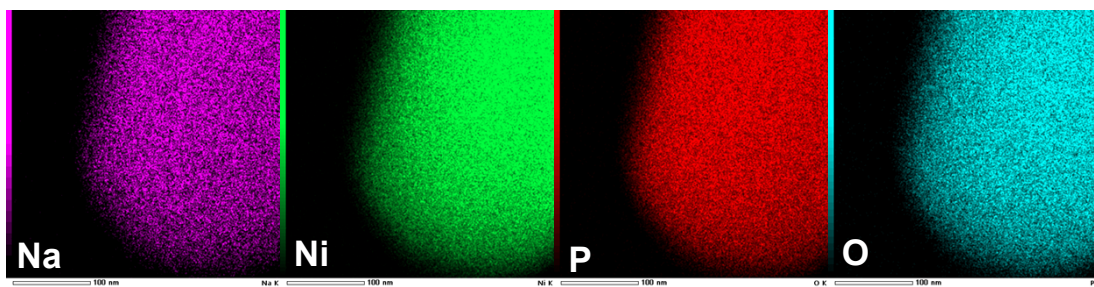

**Figure S7.** TEM-EDS mapping of prepared NNP sample



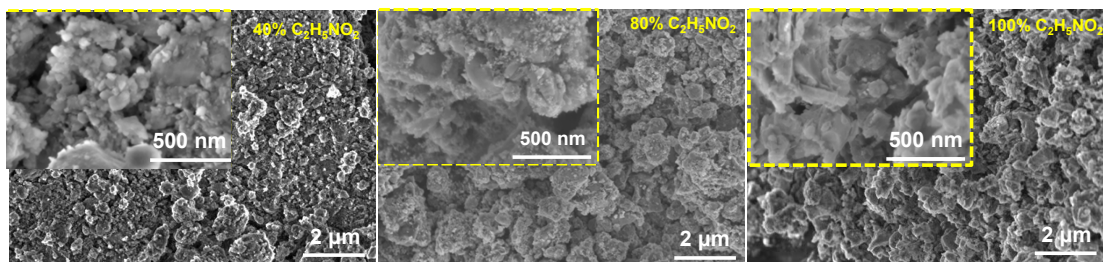

**Figure S8.** SEM images of prepared NNP@C composites obtained by the different carbon source contents

**Figure S9.** GCD curves of NNP@C composite electrodes obtained by the different carbon source contents

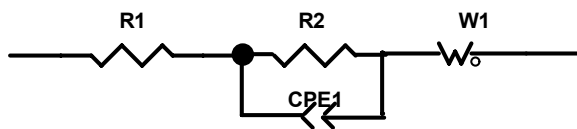

**Figure S10.** the electrical equivalent circuit used for fitting the impedance spectra.

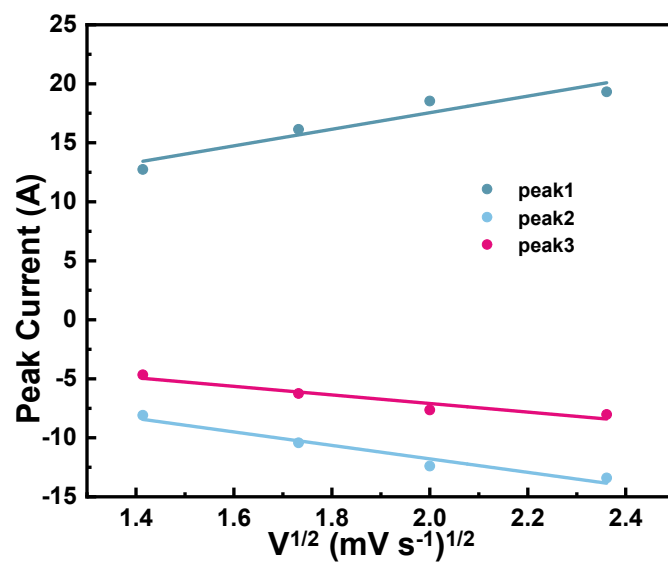

**Figure S11.** linear relationship between peak current and the square root of scan rate.

**Table S1** Rietveld XRD refinements results of NNP sample

| <b>Chemical Formula</b>                           | <b>NaNiPO<sub>4</sub></b> |
|---------------------------------------------------|---------------------------|
| Space group                                       | Pmnb                      |
| a(Å)                                              | 6.730332                  |
| b(Å)                                              | 8.76944                   |
| c(Å)                                              | 5.027296                  |
| V(Å <sup>3</sup> )                                | 29.747                    |
| R <sub>p</sub> /R <sub>wp</sub> /R <sub>exp</sub> | 2.82/4.14/3.551           |

**Table S2** Fractional coordinates and site occupancies in refined XRD pattern of NNP sample

| <b>atom</b> | <b>x</b> | <b>y</b> | <b>z</b> | <b>Occ.</b> |
|-------------|----------|----------|----------|-------------|
| Na1         | 0.25     | 0.8508   | 0.5305   | 0.01327     |
| Ni1         | 0        | 0        | 0        | 0.01027     |
| P1          | 0.25     | 0.176    | 0.464    | 0.01127     |
| O1          | 0.25     | 0.1164   | 0.7521   | 0.01109     |
| O2          | 0.25     | 0.3492   | 0.4557   | 0.01109     |
| O3          | 0.0692   | 0.1213   | 0.3174   | 0.01109     |

**Table S3** Electrochemical performances of this work compared with the reported NNP electrodes

| Cathode Material                 | specific capacitance (F g <sup>-1</sup> ) | Rate capacitance             | Cyclic performance | Refs      |
|----------------------------------|-------------------------------------------|------------------------------|--------------------|-----------|
| <i>t</i> -NNP/ <i>m</i> -NNP//AC | 125/70 (1 A g <sup>-1</sup> )             | —                            | 99% (2000)/ (50)   | 1         |
| <i>t</i> -NNP//AC                | 90 (1 A g <sup>-1</sup> )                 | 52 (20 A g <sup>-1</sup> )   | 100% (2000)        | 2         |
| <i>m</i> -NNP@NNPP               | 368 (1 mA cm <sup>-2</sup> )              | 200(20 mA cm <sup>-2</sup> ) | 90% (1000)         | 3         |
| <i>m</i> -NNP@C                  | 1045 (1 A g <sup>-1</sup> )               | 861 (25 A g <sup>-1</sup> )  | 93.4% (5000)       | This work |
| <i>m</i> -NNP                    | 528 (1 A g <sup>-1</sup> )                | 345 (20 A g <sup>-1</sup> )  | —                  | This work |
| <i>m</i> -NNP@C//AC              | 114 (1 A g <sup>-1</sup> )                | 79 (100 A g <sup>-1</sup> )  | 93.5%(5000)        | This work |

**Supporting References:**

- 1 M. Minakshi, D. Mitchell, R. Jones, F. Alenazey, T. Watcharatharapong, S. Chakraborty, R. Ahuja, *Nanoscale* 2016, **8** (21), 11291-11305.
- 2 M. Minakshi Sundaram, D. R. G. Mitchell, *Dalton Trans.* 2017, **46**, 13704-13713.
- 3 B. Senthilkumar, K. V. Sankar, L. Vasylechko, Y.-S. Lee, R. K. Selvan, *RSC Advances*. 2014, **4** (95), 53192-53200.
